# Supplementary material for: Bioinspired self-similar all-dielectric antennas: probing the effect of secondary scattering centres by Raman spectroscopy
Source: Royal Society of Chemistry journal article supplement (doi:10.1039/d0ma00509f), 2020-01-01
Supplement: d0ma00509f1.pdf [file d0ma00509f1.pdf]

## Supporting Information

# Bioinspired Self-Similar All-Dielectric Antennas: Probing the Effect of Secondary Scattering Centres by Raman Spectroscopy

Ivano Alessandri,<sup>1,2,3\*</sup> Luca Carletti,<sup>2</sup> Matteo Ferroni,<sup>2,4</sup> Costantino De Angelis,<sup>2,3</sup> Irene Vassalini<sup>1,3,5</sup>

<sup>1</sup> *INSTM-UdR Brescia, via Branze 38, 25123 Brescia, Italy*

<sup>2</sup> *Department of Information Engineering, University of Brescia, via Branze 38, 2513 Brescia, Italy*

<sup>3</sup> *INO-CNR, via Branze 38, 25123 Brescia, Italy*

<sup>4</sup> *IMM-CNR, via Gobetti 101, 40129 Bologna, Italy*

<sup>5</sup> *Mechanical and Industrial Engineering Department, University of Brescia, via Branze 38, 25123  
Brescia, Italy*

\*e-mail: [ivano.alessandri@unibs.it](mailto:ivano.alessandri@unibs.it)

**Supporting Information 1:**

Comparison between T-rer and HT-horex in detection of environmental CO<sub>2</sub>

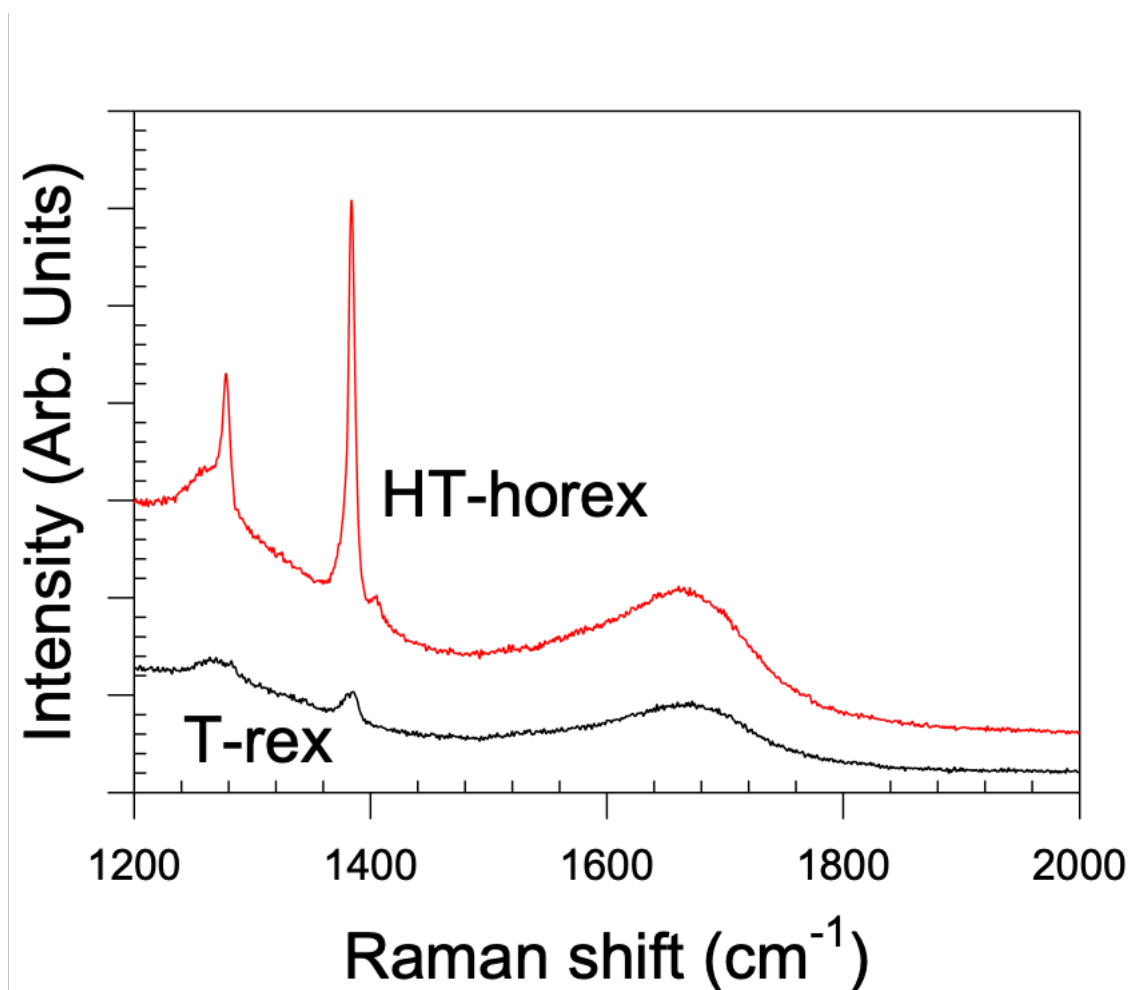

**Figure S1.** Comparison between T-rer and HT-horex in detection of environmental CO<sub>2</sub>. All the experiments were carried out by following the protocols described in reference 13 of the main text.

[13] N. Bontempi, L. Carletti, C. De Angelis, I. Alessandri, Plasmon-free SERS detection of environmental CO<sub>2</sub> on TiO<sub>2</sub> surfaces, *Nanoscale* 2016, **8**, 3226-3231.
